# Supplementary material for: Shouji: a fast and efficient pre-alignment filter for sequence alignment
Source: Oxford University Press journal article supplement (doi:10.1093/bioinformatics/btz234), 2019-03-27
Supplement: bioinformatics_35_21_4255_s4.pdf [file bioinformatics_35_21_4255_s4.pdf]

## Supplementary Materials

### 6 Shouji Filter

#### 6.1 Examining the Effect of Different Window Sizes on the Accuracy of the Shouji Algorithm.

In Fig. 4, we experimentally evaluate the effect of different window sizes on the false accept rate of Shouji. We observe that as we increase the window size, the rate of dissimilar sequences that are accepted by Shouji decreases. This is because individual matches (i.e., single zeros) are usually useless and they are not necessarily part of the common subsequences. As we increase the search window size, we are ignoring these individual matches and instead we only look for longer streaks of consecutive zeros. We also observe that a window size of 4 columns provides the lowest false accept rate (i.e., the highest accuracy).

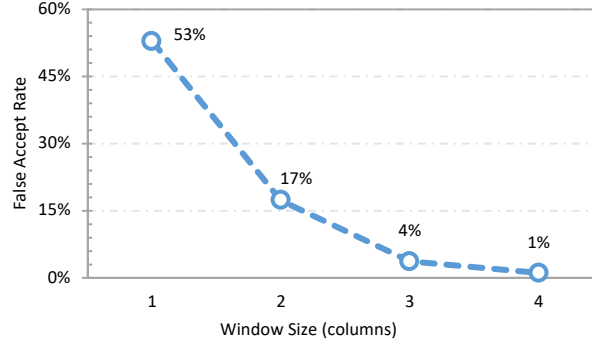

Fig. 4: The effect of the window size on the rate of the falsely-accepted sequences (i.e., dissimilar sequences that are considered as similar ones by Shouji filter). We observe that a window width of 4 columns provides the highest accuracy. We also observe that as window size increases beyond 4 columns, more similar sequences are rejected by Shouji, which should be avoided.

#### 6.2 The Shouji Algorithm and Its Analysis

We provide the Shouji algorithm along with analysis of its computational complexity (asymptotic run time and space complexity). Shouji divides the problem of finding the common subsequences into at most  $m$  subproblems, as described in Algorithm 1 (line 9). Each subproblem examines each of the  $2E+1$  bit-vectors and finds the 4-bit subsequence that has the largest number of zeros within the sliding window (line 13 to line 23). Once found, Shouji also compares the found subsequence with its corresponding subsequence in the Shouji bit-vector and stores the subsequence that has more zeros in the Shouji bit-vector (line 24). Now, let  $c$  be a constant representing the run time of examining a subsequence of 4 bits long. Then, the time complexity of the Shouji algorithm is as follows:

$$T_{Shouji}(m) = c \cdot m \cdot (2E+2) \quad (2)$$

This demonstrates that the Shouji algorithm runs in linear time with respect to the sequence length and edit distance threshold. The Shouji algorithm maintains  $2E+1$  diagonal bit-vectors and an additional auxiliary bit-vector (i.e., the Shouji bit-vector) for each two given sequences. The space complexity of the Shouji algorithm is as follows:

$$D_{Shouji}(m) = m \cdot (2E+2) \quad (3)$$

Hence, the Shouji algorithm requires linear space with respect to the sequence length and edit distance threshold. Next, we describe the hardware implementation details of the Shouji filter.

#### 6.3 Hardware Implementation

We present the FPGA chip layout for our hardware accelerator in Fig. 5. As we illustrated in the main manuscript, Section 2.3, we implement the first step of our Shouji algorithm, building neighborhood map, using shift registers and bitwise XOR operations. The second step of the Shouji algorithm is identifying the diagonally-consecutive matches. This key step involves finding the 4-bit vector that has the largest number of zeros. For each search window, there are  $2E+1$  diagonal bit-vectors and an additional Shouji bit-vector. To enable the computation to be performed in a parallel fashion, we build  $2E+2$  counters. As presented in Fig. 5, each counter counts the number of zeros in a single bit-vector. The counter takes four bits as input and generates three bits that represent the number of zeros within the window. Each counter requires three 4-input LUTs, as each LUT has a single output signal. In total, we need  $6E+6$  4-input LUTs to build a single search window. All bits of the counter output are generated at the same time, as the propagation delay through an FPGA look-up table is independent of the implemented function (Xilinx, November 17, 2014). The comparator is responsible for selecting the 4-bit subsequence that maximizes the number of consecutive matches based on the output of each counter and the Shouji bit-vector. Finally, the selected 4-bit subsequence is then stored in the Shouji bit-vector at the same corresponding location.

| Algorithm 1: Shouji                                                                                                                                                                                                                                                                                                                                                                                                                                                                                                                                                                                                                                                                                                                                                                                                                                                                                                                                                                                                                                                                                                                                                                                                                                                                                                                                                                                                                                                                                                                                                                                                                                                                                                                                                                                                                                                                                                                                                                                                                                              | Comments                                                                                                                                                                                                                  |
|------------------------------------------------------------------------------------------------------------------------------------------------------------------------------------------------------------------------------------------------------------------------------------------------------------------------------------------------------------------------------------------------------------------------------------------------------------------------------------------------------------------------------------------------------------------------------------------------------------------------------------------------------------------------------------------------------------------------------------------------------------------------------------------------------------------------------------------------------------------------------------------------------------------------------------------------------------------------------------------------------------------------------------------------------------------------------------------------------------------------------------------------------------------------------------------------------------------------------------------------------------------------------------------------------------------------------------------------------------------------------------------------------------------------------------------------------------------------------------------------------------------------------------------------------------------------------------------------------------------------------------------------------------------------------------------------------------------------------------------------------------------------------------------------------------------------------------------------------------------------------------------------------------------------------------------------------------------------------------------------------------------------------------------------------------------|---------------------------------------------------------------------------------------------------------------------------------------------------------------------------------------------------------------------------|
| <b>Input:</b> text ( $T$ ), pattern ( $P$ ), edit distance threshold ( $E$ ).<br><b>Output:</b> 1 (Similar/Alignment is needed) / 0 (Dissimilar/Alignment is not needed).                                                                                                                                                                                                                                                                                                                                                                                                                                                                                                                                                                                                                                                                                                                                                                                                                                                                                                                                                                                                                                                                                                                                                                                                                                                                                                                                                                                                                                                                                                                                                                                                                                                                                                                                                                                                                                                                                        |                                                                                                                                                                                                                           |
| 1: $m \leftarrow \text{length}(T)$ ;<br>2: <b>for</b> $i \leftarrow 1$ to $m$ <b>do</b><br>3: <b>for</b> $j \leftarrow i-E$ to $i+E$ <b>do</b><br>4: <b>if</b> $T[i] == P[j]$ <b>then</b><br>5: $N[i,j] \leftarrow 0$ ;<br>6: <b>else</b> $N[i,j] \leftarrow 1$ ;<br>7: <b>for</b> $i \leftarrow 1$ to $m$ <b>do</b> $\text{Shouji}[i] \leftarrow 1$ ; //initializing Shouji bit-vector to 1's<br>8: $Z \leftarrow [0000]$ ; // $Z$ is 4-bit vector that stores the longest streak of diagonally-consecutive zeros<br>9: <b>for</b> $i \leftarrow 1$ to $m$ <b>do</b> // slide the search window by a single step<br>10: <b>for</b> $j \leftarrow 1$ to $E$ <b>do</b> // iterate over the diagonals<br>11:         //function $\text{CZ}(D)$ counts the occurrence of zeros in its input bit-vector $D$<br>12:         // Compare $j^{\text{th}}$ lower diagonal with $j^{\text{th}}$ upper diagonal<br>13: <b>if</b> $\text{CZ}(N[i+j:i+3+j, i:i+3]) > \text{CZ}(N[i:i+3, i+j:i+3+j])$ <b>then</b><br>14: $Z \leftarrow N[i+j:i+3+j, i:i+3]$ ;<br>15:         // If $j^{\text{th}}$ lower and $j^{\text{th}}$ upper diagonals have the same number of<br>16:         // zeros then selects the diagonal that starts with zeros<br>17: <b>else if</b> $\text{CZ}(N[i+j:i+3+j, i:i+3]) == \text{CZ}(N[i:i+3, i+j:i+3+j])$ <b>then</b><br>18: <b>if</b> $N[i+j, i] == 0$ <b>then</b> $Z \leftarrow N[i+j:i+3+j, i:i+3]$ ;<br>19: <b>else if</b> $N[i, i+j] == 0$ <b>then</b> $Z \leftarrow N[i:i+3, i+j:i+3+j]$ ;<br>20:         // Compare $Z$ with the $j^{\text{th}}$ upper diagonal<br>21: <b>else</b> $Z \leftarrow N[i:i+3, i+j:i+3+j]$ ;<br>22:         // Compare $Z$ with main diagonal and Shouji bit-vector<br>23: <b>if</b> $\text{CZ}(N[i:i+3, i:i+3]) > \text{CZ}(Z)$ <b>then</b> $Z \leftarrow N[i:i+3, i:i+3]$ ;<br>24: <b>if</b> $\text{CZ}(Z) > \text{CZ}(\text{Shouji}[i:i+3])$ <b>then</b> $\text{Shouji}[i:i+3] \leftarrow Z$ ;<br>25: <b>if</b> $\text{CZ}(\text{Shouji}) \geq m-E$ <b>then return 1</b> ;<br>26: <b>else return 0</b> ;<br> | <b>Step 1:</b> Building neighborhood map ( $N$ )<br><br>Output: $2E+1$ diagonal bit-vectors<br><br><b>Step 2:</b> Identifying the Diagonally-Consecutive Matches<br><br><b>Step 3:</b> Filtering out Dissimilar Sequences |

| Algorithm 2: CZ (count zeros) function                                                                                                                                                                                                                                                                                                                                                         |
|------------------------------------------------------------------------------------------------------------------------------------------------------------------------------------------------------------------------------------------------------------------------------------------------------------------------------------------------------------------------------------------------|
| <b>Function:</b> $\text{CZ}()$ counts the number of occurrences of zeros.<br><b>Input:</b> bit-vector $D$ .<br><b>Output:</b> number of occurrences of zeros.<br>1: $\text{count} \leftarrow 0$ ;<br>2: <b>for</b> $i \leftarrow 1$ to $\text{length}(D)$ <b>do</b><br>3: <b>if</b> $D[i] == 0$ <b>then</b><br>4: $\text{count} \leftarrow \text{count} + 1$ ;<br>5: <b>return count</b> ;<br> |

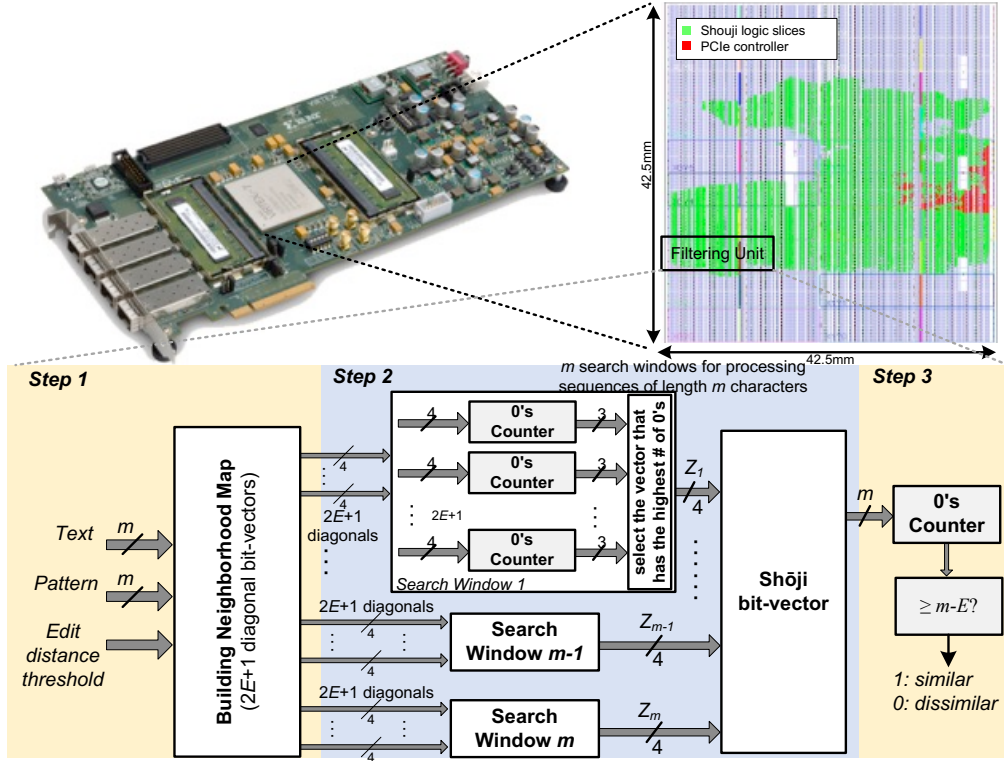

Fig. 5: FPGA chip layout for Shouji and block diagram of the search window scheme implemented in a Xilinx VC709 FPGA for a single filtering unit.

## 7 MAGNET Filter

First, we provide the MAGNET (Alser et al., July 2017) algorithm and describe its main filtering mechanism. Second, we analyze the computational complexity of the MAGNET algorithm. Third, we provide details about the hardware implementation of the MAGNET algorithm.

### 7.1 Overview

MAGNET (Alser et al., July 2017) is another filter that uses a divide-and-conquer technique to find all the  $E+1$  common subsequences, if any, and sum up their length. By calculating their total length, we can estimate the total number of edits between the two given sequences. If the total length of the  $E+1$  common subsequences is less than  $m-E$ , then there exist more common subsequences than  $E+1$  that are associated with more edits than allowed. If so, then MAGNET excludes the two given sequences from optimal alignment calculation. We present the algorithm of MAGNET in Algorithm 3.

| Algorithm 3: MAGNET                                                                                                                                                                                                                                               | Comments                                                                                    |
|-------------------------------------------------------------------------------------------------------------------------------------------------------------------------------------------------------------------------------------------------------------------|---------------------------------------------------------------------------------------------|
| <b>Input:</b> text ( $T$ ), pattern ( $P$ ), edit distance threshold ( $E$ ).<br><b>Output:</b> 1 (Similar/Alignment is needed) / 0 (Dissimilar/Alignment is not needed).                                                                                         |                                                                                             |
| 1: $m \leftarrow \text{length}(T)$ ;<br>2: <b>for</b> $i \leftarrow 1$ to $m$ <b>do</b><br>3: <b>for</b> $j \leftarrow i-E$ to $i+E$ <b>do</b><br>4: <b>if</b> $T[j] == P[i]$ <b>then</b><br>5: $N[i,j] \leftarrow 0$ ;<br>6: <b>else</b> $N[i,j] \leftarrow 1$ ; | <b>Step 1:</b> Building neighborhood map ( $N$ )<br><br>Output: $2E+1$ diagonal bit-vectors |
| 7: <b>for</b> $i \leftarrow 1$ to $m$ <b>do</b><br>8: $\text{MAGNET}[i] \leftarrow 1$ ; // Initializing MAGNET bit-vector<br>9: $[\text{MAGNET}, \text{calls}] \leftarrow \text{EXEN}(N, 1, m, E, \text{MAGNET}, 1)$ ;                                            | <b>Step 2 - Step 4</b>                                                                      |
| 10: // Function CZ() returns number of zeros<br>11: <b>if</b> $\text{CZ}(\text{MAGNET}) \geq m-E$ <b>then</b> <b>return</b> 1; <b>else</b> <b>return</b> 0;                                                                                                       | <b>Step 5:</b> Filtering out Dissimilar Sequences                                           |

Finding the common subsequences involves four main steps. (1) **Building the neighborhood map**. Similar to Shouji, MAGNET starts with building the  $2E+1$  diagonal bit-vectors of the neighborhood map for the two given sequences (Algorithm 3, lines 2-6). (2) **Extraction**. Each diagonal bit-vector nominates its local longest subsequence of consecutive zeros. Among all nominated subsequences, a single subsequence is selected as a global longest

subsequence based on its length (Algorithm 4, lines 2-11). MAGNET evaluates if the length of the global longest subsequence is less than  $\lceil (m - E)/(E + 1) \rceil$ , then the two sequences contain more edits than allowed, which cause the common subsequences to be shorter (i.e., each edit results in dividing the sequence pair into more common subsequences). If so, then the two sequences are rejected (Algorithm 4, lines 12-13). Otherwise, MAGNET stores the length of the global longest subsequence to be used towards calculating the total length of all  $E+1$  common subsequences. The lower bound equality occurs when all edits are equispaced and all  $E+1$  subsequences are of the same length. (3) **Encapsulation**. The next step is essential to preserve the original edit (or edits) that causes a single common sequence to be divided into smaller subsequences. MAGNET penalizes the found subsequence by two edits (one for each side). This is achieved by excluding from the search space of all bit-vectors the indices of the found subsequence in addition to the index of the surrounding single bit from both left and right sides (Algorithm 4, lines 14-17). (4) **Divide-and-Conquer Recursion**. In order to locate the other  $E$  non-overlapping subsequences, MAGNET applies a divide-and-conquer technique where we decompose the problem of finding the non-overlapping common subsequences into two subproblems. While the first subproblem focuses on finding the next long subsequence that is located on the right-hand side of the previously found subsequence in the first *extraction* step (Algorithm 4, line 15), the second subproblem focuses on the other side of the found subsequence (Algorithm 4, line 17). Each subproblem is solved by recursively repeating all the three steps mentioned above, but without evaluating again the length of the longest subsequence. MAGNET applies two early termination methods that aim to reduce the execution time of the filter. The first method is evaluating the length of the longest subsequence in the first recursion call (Algorithm 4, lines 12-13). The second method is limiting the number of the subsequences to be found to at most  $E+1$ , regardless of their actual number for the given sequence pair (Algorithm 4, line 1). (5) **Filtering out Dissimilar Sequences**. Once after the termination, if the total length of all found common subsequences is less than  $m-E$ , then the two sequences are rejected. Otherwise, they are considered to be similar and the alignment can be measured using sophisticated alignment algorithms.

| Algorithm 4: EXEN function                                                                                                            | Comments                                                                                     |
|---------------------------------------------------------------------------------------------------------------------------------------|----------------------------------------------------------------------------------------------|
| <b>Function:</b> EXEN() extracts the longest subsequence of consecutive zeros and generate two subproblems.                           |                                                                                              |
| <b>Input:</b> Neighborhood map ( $N$ ), start index ( $SI$ ), end index ( $EI$ ), $E$ , MAGNET bit-vector, number of recursion calls. |                                                                                              |
| <b>Output:</b> updated MAGNET bit-vector, updated number of calls.                                                                    |                                                                                              |
| 1: <b>if</b> ( $SI \leq EI$ and $calls \leq E+1$ ) <b>then</b> // Early termination condition                                         |                                                                                              |
| 2: // Function CCZ() returns number and indices of longest                                                                            |                                                                                              |
| 3: // subsequence of diagonally consecutive zeros                                                                                     |                                                                                              |
| 4: <b>for</b> $j \leftarrow 1$ to $E$ <b>do</b> //Extraction                                                                          |                                                                                              |
| 5: $[X,s1,e1] \leftarrow CCZ(N[SI+j,SI],EI)$ ; // Lower diagonal                                                                      |                                                                                              |
| 6: $[Y,s2,e2] \leftarrow CCZ(N[SI,SI+j],EI)$ ; // Upper diagonal                                                                      | Step 2: Extracting the longest subsequence of consecutive zeros                              |
| 7: <b>if</b> $X > Y$ <b>then</b> $s \leftarrow s1$ ; $e \leftarrow e1$ ;                                                              |                                                                                              |
| 8: <b>else</b> $s \leftarrow s2$ ; $e \leftarrow e2$ ;                                                                                |                                                                                              |
| 9: $[X,s1,e1] \leftarrow CCZ(N[SI,SI],EI)$ ;                                                                                          |                                                                                              |
| 10: <b>if</b> $X > (e-s+1)$ <b>then</b>                                                                                               |                                                                                              |
| 11: $s \leftarrow s1$ ; $e \leftarrow e1$ ;                                                                                           |                                                                                              |
| 12: <b>if</b> ( $calls=1$ and $(e-s+1) < \lceil (m - E)/(E + 1) \rceil$ ) <b>then</b>                                                 | Early termination condition (only in first call)                                             |
| 13: <b>return</b> [ $MAGNET, 0$ ];                                                                                                    |                                                                                              |
| 14: // Right subproblem with encapsulation                                                                                            | Step 3: Encapsulating the found longest subsequence and Step 4: Divide-and-Conquer Recursion |
| 15: [ $MAGNET, calls$ ] $\leftarrow EXEN(N,e+2,EI, E, MAGNET, calls+1)$ ;                                                             |                                                                                              |
| 16: // Left subproblem with encapsulation                                                                                             |                                                                                              |
| 17: [ $MAGNET, calls$ ] $\leftarrow EXEN(N,SI, s-2, E, MAGNET, calls+1)$ ;                                                            |                                                                                              |
| 18: <b>return</b> [ $MAGNET, calls$ ];                                                                                                |                                                                                              |
| 19: <b>else return</b> [ $MAGNET, calls-1$ ];                                                                                         |                                                                                              |

## 7.2 Analysis of the MAGNET Algorithm

We analyze the asymptotic run time and space complexity of the MAGNET algorithm. MAGNET applies a divide-and-conquer technique that divides the problem of finding the common subsequences into two subproblems in each recursion call. In the first recursion call, the extracted common subsequence is of length at least  $a = \lceil (m - E)/(E + 1) \rceil$  bases. This reduces the problem of finding the common subsequences from  $m$  to at most  $m-a$ , which is further divided into two subproblems: a left subproblem and a right subproblem. For the sake of simplicity, we assume that the size of the left and the right subproblems decreases by a factor of  $b$  and  $c$ , respectively, as follows:

$$m = a + 2 + m/b + m/c \quad (4)$$

The addition of 2 bases is for the encapsulation bits added at each recursion call. Now, let  $T_{MAGNET}(m)$  be the time complexity of MAGNET algorithm, for identifying non-overlapping subsequences. If it takes  $O(km)$  time to find the global longest subsequence and divide the problem into two subproblems, where  $k = 2E+1$  is the number of bit-vectors, we get the following recurrence equation:

$$T_{MAGNET}(m) = T_{MAGNET}(m/b) + T_{MAGNET}(m/c) + O(km) \quad (5)$$

Given that the early termination condition of MAGNET algorithm restricts the recursion depth as follows:

$$\text{Recursion tree depth} = \lceil \log_2(E + 1) \rceil - 1 \quad (6)$$

Solving the recurrence in (5) using (4) and (6) by applying the recursion-tree method provides a loose upper-bound to the time complexity as follows:

$$\begin{aligned} T_{MAGNET}(m) &= O(km) \cdot \sum_{x=0}^{\lceil \log_2(E+1) \rceil - 1} \left(\frac{1}{b} + \frac{1}{c}\right)^x \\ &\approx O(fkm) \end{aligned} \quad (7)$$

where  $f$  is a fractional number satisfies the following range:  $1 \leq f < 2$ . This in turn demonstrates that the MAGNET algorithm runs in linear time with respect to the sequence length and edit distance threshold and hence it is computationally inexpensive. The space complexity of the MAGNET algorithm is as follows:

$$\begin{aligned} D_{\text{MAGNET}}(m) &= D_{\text{MAGNET}}(m/b) + D_{\text{MAGNET}}(m/c) + (km+m) \\ &\approx O(fkm + fm) \end{aligned} \tag{8}$$

Hence, MAGNET algorithm requires linear space with respect to the read length and edit distance threshold. Next, we describe the hardware implementation details of MAGNET filter.

### 7.3 Hardware Implementation

We outline the challenges that are encountered in implementing the MAGNET filter to be used in our accelerator design. Implementing the MAGNET algorithm on an FPGA is more challenging than implementing the Shouji algorithm due to the random location and variable length of each of the  $E+1$  common subsequences. Verilog-2011 imposes two challenges on our architecture as it does not support variable-size partial selection and indexing of a group of bits from a vector (McNamara, 2001). In particular, the first challenge lies in excluding the extracted common subsequence along with its encapsulation bits from the search space of the next recursion call. The second challenge lies in dividing the problem into two subproblems, each of which has an unknown size at design time. To address these limitations and tackle the two design challenges, we keep the problem size fixed at each recursion call. We exclude the longest found subsequence from the search space by amending all bits of all  $2E+1$  bit-vectors that are located within the indices (locations) of the encapsulation bits to '1's. This ensures that we exclude the longest found subsequence and its corresponding location in all other bit-vectors during the subsequent recursion calls. We build the MAGNET accelerator using the same FPGA board as that used for Shouji for a fair comparison.

## 8 Examples of Applying the Shouji and MAGNET algorithms

In this section, we provide three examples of applying the Shouji and MAGNET filtering algorithms to different sequence pairs. In Fig. 6, we set the edit distance threshold to 4 in these examples. The diagonal vectors of the neighborhood map are horizontally presented in the same order of the diagonal vectors for a better illustration. In the first two examples (Fig. 6(a) and Fig. 6(b)), we observe that MAGNET is highly accurate in providing the exact location of the edits in the MAGNET bit-vector. This is due to two main reasons. First, MAGNET finds the exact length of each common subsequence by performing multiple individual iteration for each common subsequence. Second, it manually encapsulates each found longest subsequence of consecutive zeros by ones, which ensures to maintain the edits in the MAGNET bit-vector. On the contrary, Shouji uses overlapping search windows to detect segments of consecutive zeros. If two segments of consecutive zeros are overlapped within a single search window, then the edit between the two segments is sometimes eliminated by the overlapping zeros of the two segments as shown in Fig. 6(a).

Pairwise alignment can be performed as a *global* alignment, where two sequences of the same length are aligned end-to-end, or a *local* alignment, where subsequences of the two given sequences are aligned. It can also be performed as a *semi-global* alignment (called *glocal*), where the entirety of one sequence is aligned towards one of the ends of the other sequence. To ensure correct pre-alignment filtering and avoid rejecting a correct alignment, pre-alignment filter needs to consider counting the number of edits in a similar way to that of optimal alignment algorithm. This means that if the optimal alignment algorithm performs local alignment, then the pre-alignment filter should also perform local edit distance calculation. This can be achieved by not considering the leading and trailing edits in the total count of edits between two given sequences. Fig 6(a) and Fig. 6(b) show examples of global pre-alignment filtering. Fig 6(c) shows an example of local pre-alignment filtering, where the two given sequences have different lengths. While Shouji is conceptually able to perform local pre-alignment and glocal pre-alignment filtering, such support is not currently implemented in our public release of Shouji (<https://github.com/CMU-SAFARI/Shouji>). The current implementation of Shouji performs only global pre-alignment filtering that requires the text and reference sequences to be of the same length.



**Table 6: Details of our first four datasets (set 1, set 2, set 3, and set 4). We use Edlib to benchmark the accepted (i.e., aligned) pairs and the rejected (i.e., unaligned) pairs for edit distance thresholds of  $E=0$  up to  $E=10$  edits.**

| Dataset<br>$E$ | Set_1      |            | Set_2      |            | Set_3     |            | Set_4    |            |
|----------------|------------|------------|------------|------------|-----------|------------|----------|------------|
|                | Accepted   | Rejected   | Accepted   | Rejected   | Accepted  | Rejected   | Accepted | Rejected   |
| 0              | 381,901    | 29,618,099 | 124,531    | 29,875,469 | 11,989    | 29,988,011 | 11       | 29,999,989 |
| 1              | 1,345,842  | 28,654,158 | 441,927    | 29,558,073 | 44,565    | 29,955,435 | 18       | 29,999,982 |
| 2              | 3,266,455  | 26,733,545 | 1,073,808  | 28,926,192 | 108,979   | 29,891,021 | 24       | 29,999,976 |
| 3              | 5,595,596  | 24,404,404 | 2,053,181  | 27,946,819 | 206,903   | 29,793,097 | 27       | 29,999,973 |
| 4              | 7,825,272  | 22,174,728 | 3,235,057  | 26,764,943 | 334,712   | 29,665,288 | 29       | 29,999,971 |
| 5              | 9,821,308  | 20,178,692 | 4,481,341  | 25,518,659 | 490,670   | 29,509,330 | 34       | 29,999,966 |
| 6              | 11,650,490 | 18,349,510 | 5,756,432  | 24,243,568 | 675,357   | 29,324,643 | 83       | 29,999,917 |
| 7              | 13,407,801 | 16,592,199 | 7,091,373  | 22,908,627 | 891,447   | 29,108,553 | 177      | 29,999,823 |
| 8              | 15,152,501 | 14,847,499 | 8,531,811  | 21,468,189 | 1,151,447 | 28,848,553 | 333      | 29,999,667 |
| 9              | 16,894,680 | 13,105,320 | 10,102,726 | 19,897,274 | 1,469,996 | 28,530,004 | 711      | 29,999,289 |
| 10             | 18,610,897 | 11,389,103 | 11,807,488 | 18,192,512 | 1,868,827 | 28,131,173 | 1,627    | 29,998,373 |

**Table 7: Details of our second four datasets (set\_5, set\_6, set\_7, and set\_8). We report the accepted and the rejected pairs for edit distance thresholds of  $E=0$  up to  $E=15$  edits.**

| Dataset<br>$E$ | Set_5      |            | Set_6     |            | Set_7    |            | Set_8    |            |
|----------------|------------|------------|-----------|------------|----------|------------|----------|------------|
|                | Accepted   | Rejected   | Accepted  | Rejected   | Accepted | Rejected   | Accepted | Rejected   |
| 0              | 1,440,497  | 28,559,503 | 248,920   | 29,751,080 | 444      | 29,999,556 | 201      | 29,999,799 |
| 1              | 1,868,909  | 28,131,091 | 324,056   | 29,675,944 | 695      | 29,999,305 | 327      | 29,999,673 |
| 3              | 2,734,841  | 27,265,159 | 481,724   | 29,518,276 | 927      | 29,999,073 | 444      | 29,999,556 |
| 4              | 3,457,975  | 26,542,025 | 612,747   | 29,387,253 | 994      | 29,999,006 | 475      | 29,999,525 |
| 6              | 5,320,713  | 24,679,287 | 991,606   | 29,008,394 | 1,097    | 29,998,903 | 529      | 29,999,471 |
| 7              | 6,261,628  | 23,738,372 | 1,226,695 | 28,773,305 | 1,136    | 29,998,864 | 546      | 29,999,454 |
| 9              | 7,916,882  | 22,083,118 | 1,740,067 | 28,259,933 | 1,221    | 29,998,779 | 587      | 29,999,413 |
| 10             | 8,658,021  | 21,341,979 | 2,009,835 | 27,990,165 | 1,274    | 29,998,726 | 612      | 29,999,388 |
| 12             | 10,131,849 | 19,868,151 | 2,591,299 | 27,408,701 | 1,701    | 29,998,299 | 710      | 29,999,290 |
| 13             | 10,917,472 | 19,082,528 | 2,923,699 | 27,076,301 | 2,146    | 29,997,854 | 796      | 29,999,204 |
| 15             | 12,646,165 | 17,353,835 | 3,730,089 | 26,269,911 | 3,921    | 29,996,079 | 1,153    | 29,998,847 |

**Table 8: Details of our third four datasets (set\_9, set\_10, set\_11, and set\_12). We report the accepted and the rejected pairs for edit distance thresholds of  $E=0$  up to  $E=25$  edits.**

| Dataset<br>$E$ | Set_9     |            | Set_10   |            | Set_11   |            | Set_12   |            |
|----------------|-----------|------------|----------|------------|----------|------------|----------|------------|
|                | Accepted  | Rejected   | Accepted | Rejected   | Accepted | Rejected   | Accepted | Rejected   |
| 0              | 707,517   | 29,292,483 | 43,565   | 29,956,435 | 4,389    | 29,995,611 | 49       | 29,999,951 |
| 2              | 1,462,242 | 28,537,758 | 88,141   | 29,911,859 | 8,970    | 29,991,030 | 163      | 29,999,837 |
| 5              | 1,973,835 | 28,026,165 | 119,100  | 29,880,900 | 12,420   | 29,987,580 | 301      | 29,999,699 |
| 7              | 2,361,418 | 27,638,582 | 145,290  | 29,854,710 | 15,405   | 29,984,595 | 375      | 29,999,625 |
| 10             | 3,183,271 | 26,816,729 | 205,536  | 29,794,464 | 22,014   | 29,977,986 | 472      | 29,999,528 |
| 12             | 3,862,776 | 26,137,224 | 257,360  | 29,742,640 | 27,817   | 29,972,183 | 520      | 29,999,480 |
| 15             | 4,915,346 | 25,084,654 | 346,809  | 29,653,191 | 37,710   | 29,962,290 | 575      | 29,999,425 |
| 17             | 5,550,869 | 24,449,131 | 409,978  | 29,590,022 | 44,225   | 29,955,775 | 623      | 29,999,377 |
| 20             | 6,404,832 | 23,595,168 | 507,177  | 29,492,823 | 54,650   | 29,945,350 | 718      | 29,999,282 |
| 22             | 6,959,616 | 23,040,384 | 572,769  | 29,427,231 | 62,255   | 29,937,745 | 842      | 29,999,158 |
| 25             | 7,857,750 | 22,142,250 | 673,254  | 29,326,746 | 74,761   | 29,925,239 | 1,133    | 29,998,867 |





Table 9: Details of evaluating the number of falsely-accepted sequence pairs (FA) and falsely-rejected sequence pairs (FR) of Shouji, MAGNET, GateKeeper, and SHD using four datasets, set\_1, set\_2, set\_3, and set\_4, with a read length of 100 bp.

|       | E  | Read Aligner |            | Pre-alignment Filter |    |            |    |           |    |            |    |
|-------|----|--------------|------------|----------------------|----|------------|----|-----------|----|------------|----|
|       |    | Edlib        |            | SHD                  |    | GateKeeper |    | MAGNET    |    | Shouji     |    |
|       |    | Accepted     | Rejected   | FA                   | FR | FA         | FR | FA        | FR | FA         | FR |
| Set_1 | 0  | 381,901      | 29,618,099 | 10                   | 0  | 0          | 0  | 963,941   | 0  | 0          | 0  |
|       | 1  | 1,345,842    | 28,654,158 | 783,185              | 0  | 783,185    | 0  | 800,099   | 0  | 333,320    | 0  |
|       | 2  | 3,266,455    | 26,733,545 | 2,704,128            | 0  | 2,704,128  | 0  | 1,876,518 | 0  | 1,283,004  | 0  |
|       | 3  | 5,595,596    | 24,404,404 | 5,237,529            | 0  | 5,237,529  | 0  | 2,428,301 | 0  | 2,674,876  | 0  |
|       | 4  | 7,825,272    | 22,174,728 | 8,231,507            | 0  | 8,231,507  | 0  | 2,662,902 | 1  | 4,399,886  | 0  |
|       | 5  | 9,821,308    | 20,178,692 | 11,195,124           | 0  | 11,195,124 | 0  | 2,916,838 | 0  | 6,452,280  | 0  |
|       | 6  | 11,650,490   | 18,349,510 | 13,781,651           | 0  | 13,781,651 | 0  | 3,406,303 | 4  | 9,373,309  | 0  |
|       | 7  | 13,407,801   | 16,592,199 | 14,283,519           | 0  | 14,283,519 | 0  | 4,026,433 | 19 | 11,113,616 | 0  |
|       | 8  | 15,152,501   | 14,847,499 | 13,814,295           | 0  | 13,814,295 | 0  | 4,745,672 | 27 | 11,990,529 | 0  |
|       | 9  | 16,894,680   | 13,105,320 | 13,105,305           | 0  | 13,105,305 | 0  | 5,319,627 | 41 | 11,693,396 | 0  |
|       | 10 | 18,610,897   | 11,389,103 | 11,389,103           | 0  | 11,389,103 | 0  | 5,673,172 | 31 | 10,664,722 | 0  |
|       | E  | Accepted     | Rejected   | FA                   | FR | FA         | FR | FA        | FR | FA         | FR |
| Set_2 | 0  | 124,531      | 29,875,469 | 2                    | 0  | 0          | 0  | 317,396   | 0  | 0          | 0  |
|       | 1  | 441,927      | 29,558,073 | 276,271              | 0  | 276,271    | 0  | 265,663   | 0  | 114,225    | 0  |
|       | 2  | 1,073,808    | 28,926,192 | 1,273,787            | 0  | 1,273,787  | 0  | 779,683   | 0  | 524,886    | 0  |
|       | 3  | 2,053,181    | 27,946,819 | 3,370,661            | 0  | 3,370,661  | 0  | 1,257,472 | 0  | 1,494,883  | 0  |
|       | 4  | 3,235,057    | 26,764,943 | 6,695,487            | 0  | 6,695,487  | 0  | 1,621,885 | 1  | 3,085,801  | 0  |
|       | 5  | 4,481,341    | 25,518,659 | 10,798,431           | 0  | 10,798,431 | 0  | 1,995,105 | 0  | 5,410,196  | 0  |
|       | 6  | 5,756,432    | 24,243,568 | 15,305,752           | 0  | 15,305,752 | 0  | 2,574,171 | 2  | 9,218,900  | 0  |
|       | 7  | 7,091,373    | 22,908,627 | 17,347,813           | 0  | 17,347,813 | 0  | 3,391,117 | 5  | 12,401,268 | 0  |
|       | 8  | 8,531,811    | 21,468,189 | 18,015,876           | 0  | 18,015,876 | 0  | 4,485,756 | 19 | 14,865,877 | 0  |
|       | 9  | 10,102,726   | 19,897,274 | 19,897,204           | 0  | 19,897,204 | 0  | 5,639,763 | 38 | 15,670,345 | 0  |
|       | 10 | 11,807,488   | 18,192,512 | 18,192,512           | 0  | 18,192,512 | 0  | 6,691,920 | 52 | 15,222,777 | 0  |
|       | E  | Accepted     | Rejected   | FA                   | FR | FA         | FR | FA        | FR | FA         | FR |
| Set_3 | 0  | 11,989       | 29,988,011 | 1                    | 0  | 0          | 0  | 32,576    | 0  | 0          | 0  |
|       | 1  | 44,565       | 29,955,435 | 30,065               | 0  | 30,065     | 0  | 27,639    | 0  | 13,060     | 0  |
|       | 2  | 108,979      | 29,891,021 | 153,613              | 0  | 153,613    | 0  | 77,792    | 0  | 61,519     | 0  |
|       | 3  | 206,903      | 29,793,097 | 466,411              | 0  | 466,411    | 0  | 133,654   | 0  | 200,269    | 0  |
|       | 4  | 334,712      | 29,665,288 | 1,254,259            | 0  | 1,254,259  | 0  | 193,569   | 0  | 521,359    | 0  |
|       | 5  | 490,670      | 29,509,330 | 2,767,674            | 0  | 2,767,674  | 0  | 268,750   | 0  | 1,206,373  | 0  |
|       | 6  | 675,357      | 29,324,643 | 6,227,154            | 0  | 6,227,154  | 0  | 385,154   | 0  | 2,983,331  | 0  |
|       | 7  | 891,447      | 29,108,553 | 9,695,580            | 0  | 9,695,580  | 0  | 585,853   | 0  | 5,431,357  | 0  |
|       | 8  | 1,151,447    | 28,848,553 | 12,921,874           | 0  | 12,921,874 | 0  | 931,084   | 1  | 8,532,786  | 0  |
|       | 9  | 1,469,996    | 28,530,004 | 28,529,540           | 0  | 28,529,540 | 0  | 1,466,018 | 9  | 11,228,839 | 0  |
|       | 10 | 1,868,827    | 28,131,173 | 28,131,173           | 0  | 28,131,173 | 0  | 2,251,403 | 6  | 13,630,704 | 0  |
|       | E  | Accepted     | Rejected   | FA                   | FR | FA         | FR | FA        | FR | FA         | FR |
| Set_4 | 0  | 11           | 29,999,989 | 0                    | 0  | 0          | 0  | 7         | 0  | 0          | 0  |
|       | 1  | 18           | 29,999,982 | 14                   | 0  | 14         | 0  | 5         | 0  | 2          | 0  |
|       | 2  | 24           | 29,999,976 | 155                  | 0  | 155        | 0  | 2         | 0  | 15         | 0  |
|       | 3  | 27           | 29,999,973 | 1,196                | 0  | 1,196      | 0  | 4         | 0  | 216        | 0  |
|       | 4  | 29           | 29,999,971 | 7,436                | 0  | 7,436      | 0  | 13        | 0  | 1,986      | 0  |
|       | 5  | 34           | 29,999,966 | 32,792               | 0  | 32,792     | 0  | 82        | 0  | 10,551     | 0  |
|       | 6  | 83           | 29,999,917 | 155,134              | 0  | 155,134    | 0  | 298       | 0  | 57,258     | 0  |
|       | 7  | 177          | 29,999,823 | 417,444              | 0  | 417,444    | 0  | 1,030     | 0  | 214,005    | 0  |
|       | 8  | 333          | 29,999,667 | 1,031,480            | 0  | 1,031,480  | 0  | 3,129     | 0  | 675,029    | 0  |
|       | 9  | 711          | 29,999,289 | 29,997,022           | 0  | 29,997,022 | 0  | 8,234     | 0  | 1,742,476  | 0  |
|       | 10 | 1,627        | 29,998,373 | 29,998,373           | 0  | 29,998,373 | 0  | 19,013    | 0  | 3,902,535  | 0  |

Table 10: Details of evaluating the number of falsely-accepted sequence pairs (FA) and falsely-rejected sequence pairs (FR) of Shouji, MAGNET, GateKeeper, and SHD using four datasets, set\_5, set\_6, set\_7, and set\_8, with a read length of 150 bp.

|       | E     | Read Aligner |            | Pre-alignment Filter |         |            |         |           |         |            |         |    |
|-------|-------|--------------|------------|----------------------|---------|------------|---------|-----------|---------|------------|---------|----|
|       |       | Edlib        |            | SHD                  |         | GateKeeper |         | MAGNET    |         | Shouji     |         |    |
|       |       | Accepted     | Rejected   | FA                   | FR      | FA         | FR      | FA        | FR      | FA         | FR      |    |
| Set_5 | 0     | 1,440,497    | 28,559,503 | 0                    | 0       | 0          | 0       | 428,412   | 0       | 0          | 0       |    |
|       | 1     | 1,868,909    | 28,131,091 | 173,573              | 0       | 173,573    | 0       | 156,891   | 0       | 113,519    | 0       |    |
|       | 3     | 2,734,841    | 27,265,159 | 2,080,279            | 0       | 2,080,279  | 0       | 725,873   | 0       | 1,539,365  | 0       |    |
|       | 4     | 3,457,975    | 26,542,025 | 4,023,762            | 0       | 4,023,762  | 0       | 1,064,344 | 0       | 3,042,831  | 0       |    |
|       | 6     | 5,320,713    | 24,679,287 | 9,258,602            | 0       | 9,258,602  | 0       | 1,430,272 | 0       | 6,025,592  | 0       |    |
|       | 7     | 6,261,628    | 23,738,372 | 12,481,853           | 0       | 12,481,853 | 0       | 1,532,024 | 2       | 8,219,336  | 0       |    |
|       | 9     | 7,916,882    | 22,083,118 | 22,076,837           | 0       | 22,076,837 | 0       | 1,874,734 | 20      | 14,568,337 | 0       |    |
|       | 10    | 8,658,021    | 21,341,979 | 21,341,979           | 0       | 21,341,979 | 0       | 2,194,275 | 10      | 16,920,389 | 0       |    |
|       | 12    | 10,131,849   | 19,868,151 | 19,868,151           | 0       | 19,868,151 | 0       | 3,294,672 | 42      | 18,270,597 | 0       |    |
|       | 13    | 10,917,472   | 19,082,528 | 19,082,528           | 0       | 19,082,528 | 0       | 4,066,617 | 46      | 18,095,207 | 0       |    |
|       | 15    | 12,646,165   | 17,353,835 | 17,353,835           | 0       | 17,353,835 | 0       | 5,810,797 | 62      | 16,993,568 | 0       |    |
|       |       | E            | Accepted   | Rejected             | FA      | FR         | FA      | FR        | FA      | FR         | FA      | FR |
|       | Set_6 | 0            | 248,920    | 29,751,080           | 0       | 0          | 0       | 0         | 75,136  | 0          | 0       | 0  |
|       |       | 1            | 324,056    | 29,675,944           | 31,406  | 0          | 31,406  | 0         | 28,456  | 0          | 20,294  | 0  |
|       |       | 3            | 481,724    | 29,518,276           | 440,577 | 0          | 440,577 | 0         | 131,460 | 0          | 309,015 | 0  |
| 4     |       | 612,747      | 29,387,253 | 1,023,901            | 0       | 1,023,901  | 0       | 199,248   | 0       | 718,847    | 0       |    |
| 6     |       | 991,606      | 29,008,394 | 4,165,422            | 0       | 4,165,422  | 0       | 334,729   | 0       | 2,222,934  | 0       |    |
| 7     |       | 1,226,695    | 28,773,305 | 7,137,889            | 0       | 7,137,889  | 0       | 405,052   | 0       | 3,762,706  | 0       |    |
| 9     |       | 1,740,067    | 28,259,933 | 28,215,257           | 0       | 28,215,257 | 0       | 600,124   | 0       | 10,299,935 | 0       |    |
| 10    |       | 2,009,835    | 27,990,165 | 27,990,165           | 0       | 27,990,165 | 0       | 753,866   | 2       | 13,826,393 | 0       |    |
| 12    |       | 2,591,299    | 27,408,701 | 27,408,701           | 0       | 27,408,701 | 0       | 1,336,246 | 10      | 17,542,652 | 0       |    |
| 13    |       | 2,923,699    | 27,076,301 | 27,076,301           | 0       | 27,076,301 | 0       | 1,835,774 | 19      | 18,371,563 | 0       |    |
| 15    |       | 3,730,089    | 26,269,911 | 26,269,911           | 0       | 26,269,911 | 0       | 3,354,276 | 33      | 19,528,254 | 0       |    |
|       |       | E            | Accepted   | Rejected             | FA      | FR         | FA      | FR        | FA      | FR         | FA      | FR |
| Set_7 |       | 0            | 444        | 29,999,556           | 0       | 0          | 0       | 0         | 251     | 0          | 0       | 0  |
|       |       | 1            | 695        | 29,999,305           | 104     | 0          | 104     | 0         | 77      | 0          | 94      | 0  |
|       |       | 3            | 927        | 29,999,073           | 191     | 0          | 191     | 0         | 68      | 0          | 180     | 0  |
|       | 4     | 994          | 29,999,006 | 643                  | 0       | 643        | 0       | 53        | 0       | 421        | 0       |    |
|       | 6     | 1,097        | 29,998,903 | 47,924               | 0       | 47,924     | 0       | 57        | 0       | 19,097     | 0       |    |
|       | 7     | 1,136        | 29,998,864 | 175,481              | 0       | 175,481    | 0       | 74        | 0       | 70,540     | 0       |    |
|       | 9     | 1,221        | 29,998,779 | 29,595,345           | 0       | 29,595,345 | 0       | 461       | 0       | 857,547    | 0       |    |
|       | 10    | 1,274        | 29,998,726 | 29,998,726           | 0       | 29,998,726 | 0       | 1,017     | 0       | 1,829,338  | 0       |    |
|       | 12    | 1,701        | 29,998,299 | 29,998,299           | 0       | 29,998,299 | 0       | 4,218     | 0       | 4,893,299  | 0       |    |
|       | 13    | 2,146        | 29,997,854 | 29,997,854           | 0       | 29,997,854 | 0       | 8,620     | 0       | 6,955,205  | 0       |    |
|       | 15    | 3,921        | 29,996,079 | 29,996,079           | 0       | 29,996,079 | 0       | 31,783    | 0       | 12,854,488 | 0       |    |
|       |       | E            | Accepted   | Rejected             | FA      | FR         | FA      | FR        | FA      | FR         | FA      | FR |
|       | Set_8 | 0            | 201        | 29,999,799           | 0       | 0          | 0       | 0         | 126     | 0          | 0       | 0  |
|       |       | 1            | 327        | 29,999,673           | 58      | 0          | 58      | 0         | 42      | 0          | 43      | 0  |
|       |       | 3            | 444        | 29,999,556           | 90      | 0          | 90      | 0         | 35      | 0          | 83      | 0  |
| 4     |       | 475          | 29,999,525 | 267                  | 0       | 267        | 0       | 28        | 0       | 137        | 0       |    |
| 6     |       | 529          | 29,999,471 | 18,110               | 0       | 18,110     | 0       | 25        | 0       | 6,259      | 0       |    |
| 7     |       | 546          | 29,999,454 | 79,418               | 0       | 79,418     | 0       | 27        | 0       | 27,092     | 0       |    |
| 9     |       | 587          | 29,999,413 | 29,698,666           | 0       | 29,698,666 | 0       | 108       | 0       | 404,742    | 0       |    |
| 10    |       | 612          | 29,999,388 | 29,999,388           | 0       | 29,999,388 | 0       | 231       | 0       | 935,486    | 0       |    |
| 12    |       | 710          | 29,999,290 | 29,999,290           | 0       | 29,999,290 | 0       | 965       | 0       | 2,514,950  | 0       |    |
| 13    |       | 796          | 29,999,204 | 29,999,204           | 0       | 29,999,204 | 0       | 2,018     | 0       | 3,693,298  | 0       |    |
| 15    |       | 1,153        | 29,998,847 | 29,998,847           | 0       | 29,998,847 | 0       | 8,448     | 0       | 8,034,737  | 0       |    |

Table 11: Details of evaluating the number of falsely-accepted sequence pairs (FA) and falsely-rejected sequence pairs (FR) of Shouji, MAGNET, GateKeeper, and SHD using four datasets, set\_9, set\_10, set\_11, and set\_12, with a read length of 250 bp.

|        | E         | Read Aligner |            | Pre-alignment Filter |            |            |           |           |            |            |    |
|--------|-----------|--------------|------------|----------------------|------------|------------|-----------|-----------|------------|------------|----|
|        |           | Edlib        |            | SHD                  |            | GateKeeper |           | MAGNET    |            | Shouji     |    |
|        |           | Accepted     | Rejected   | FA                   | FR         | FA         | FR        | FA        | FR         | FA         | FR |
| Set_9  | 0         | 707,517      | 29,292,483 | 0                    | 0          | 0          | 0         | 479,104   | 0          | 0          | 0  |
|        | 2         | 1,462,242    | 28,537,758 | 238,368              | 0          | 238,368    | 0         | 143,066   | 0          | 174,366    | 0  |
|        | 5         | 1,973,835    | 28,026,165 | 1,546,126            | 0          | 1,546,126  | 0         | 226,864   | 0          | 1,071,218  | 0  |
|        | 7         | 2,361,418    | 27,638,582 | 3,933,916            | 0          | 3,933,916  | 0         | 347,819   | 1          | 2,775,419  | 0  |
|        | 10        | 3,183,271    | 26,816,729 | 26,816,729           | 0          | 26,816,729 | 0         | 624,927   | 1          | 6,669,084  | 0  |
|        | 12        | 3,862,776    | 26,137,224 | 26,137,224           | 0          | 26,137,224 | 0         | 825,468   | 9          | 11,147,373 | 0  |
|        | 15        | 4,915,346    | 25,084,654 | 25,084,654           | 0          | 25,084,654 | 0         | 1,066,633 | 14         | 18,406,823 | 0  |
|        | 17        | 5,550,869    | 24,449,131 | 24,449,131           | 0          | 24,449,131 | 0         | 1,235,999 | 23         | 20,971,826 | 0  |
|        | 20        | 6,404,832    | 23,595,168 | 23,595,168           | 0          | 23,595,168 | 0         | 1,695,351 | 35         | 22,223,170 | 0  |
|        | 22        | 6,959,616    | 23,040,384 | 23,040,384           | 0          | 23,040,384 | 0         | 2,241,984 | 42         | 22,271,215 | 0  |
| 25     | 7,857,750 | 22,142,250   | 22,142,250 | 0                    | 22,142,250 | 0          | 3,514,515 | 54        | 21,849,454 | 0          |    |
|        | E         | Accepted     | Rejected   | FA                   | FR         | FA         | FR        | FA        | FR         | FA         | FR |
| Set_10 | 0         | 43,565       | 29,956,435 | 0                    | 0          | 0          | 0         | 28,540    | 0          | 0          | 0  |
|        | 2         | 88,141       | 29,911,859 | 13,092               | 0          | 13,092     | 0         | 8,367     | 0          | 11,238     | 0  |
|        | 5         | 119,100      | 29,880,900 | 113,106              | 0          | 113,106    | 0         | 14,685    | 0          | 77,095     | 0  |
|        | 7         | 145,290      | 29,854,710 | 364,611              | 0          | 364,611    | 0         | 24,919    | 0          | 227,073    | 0  |
|        | 10        | 205,536      | 29,794,464 | 29,794,464           | 0          | 29,794,464 | 0         | 45,768    | 0          | 782,844    | 0  |
|        | 12        | 257,360      | 29,742,640 | 29,742,640           | 0          | 29,742,640 | 0         | 63,557    | 2          | 2,195,021  | 0  |
|        | 15        | 346,809      | 29,653,191 | 29,653,191           | 0          | 29,653,191 | 0         | 92,443    | 1          | 7,573,911  | 0  |
|        | 17        | 409,978      | 29,590,022 | 29,590,022           | 0          | 29,590,022 | 0         | 116,740   | 1          | 11,603,069 | 0  |
|        | 20        | 507,177      | 29,492,823 | 29,492,823           | 0          | 29,492,823 | 0         | 165,502   | 2          | 16,075,487 | 0  |
|        | 22        | 572,769      | 29,427,231 | 29,427,231           | 0          | 29,427,231 | 0         | 217,274   | 6          | 19,167,498 | 0  |
| 25     | 673,254   | 29,326,746   | 29,326,746 | 0                    | 29,326,746 | 0          | 376,323   | 7         | 24,778,497 | 0          |    |
|        | E         | Accepted     | Rejected   | FA                   | FR         | FA         | FR        | FA        | FR         | FA         | FR |
| Set_11 | 0         | 4,389        | 29,995,611 | 0                    | 0          | 0          | 0         | 2,933     | 0          | 0          | 0  |
|        | 2         | 8,970        | 29,991,030 | 1,405                | 0          | 1,405      | 0         | 890       | 0          | 1,173      | 0  |
|        | 5         | 12,420       | 29,987,580 | 12,185               | 0          | 12,185     | 0         | 1,704     | 0          | 8,489      | 0  |
|        | 7         | 15,405       | 29,984,595 | 41,555               | 0          | 41,555     | 0         | 2,644     | 0          | 24,946     | 0  |
|        | 10        | 22,014       | 29,977,986 | 29,977,986           | 0          | 29,977,986 | 0         | 4,759     | 0          | 145,053    | 0  |
|        | 12        | 27,817       | 29,972,183 | 29,972,183           | 0          | 29,972,183 | 0         | 6,729     | 1          | 833,703    | 0  |
|        | 15        | 37,710       | 29,962,290 | 29,962,290           | 0          | 29,962,290 | 0         | 9,498     | 0          | 5,088,387  | 0  |
|        | 17        | 44,225       | 29,955,775 | 29,955,775           | 0          | 29,955,775 | 0         | 12,134    | 0          | 9,832,285  | 0  |
|        | 20        | 54,650       | 29,945,350 | 29,945,350           | 0          | 29,945,350 | 0         | 18,366    | 0          | 16,815,067 | 0  |
|        | 22        | 62,255       | 29,937,745 | 29,937,745           | 0          | 29,937,745 | 0         | 25,411    | 2          | 20,798,178 | 0  |
| 25     | 74,761    | 29,925,239   | 29,925,239 | 0                    | 29,925,239 | 0          | 44,377    | 1         | 26,094,659 | 0          |    |
|        | E         | Accepted     | Rejected   | FA                   | FR         | FA         | FR        | FA        | FR         | FA         | FR |
| Set_12 | 0         | 49           | 29,999,951 | 0                    | 0          | 0          | 0         | 53        | 0          | 0          | 0  |
|        | 2         | 163          | 29,999,837 | 71                   | 0          | 71         | 0         | 44        | 0          | 55         | 0  |
|        | 5         | 301          | 29,999,699 | 249                  | 0          | 249        | 0         | 49        | 0          | 161        | 0  |
|        | 7         | 375          | 29,999,625 | 698                  | 0          | 698        | 0         | 48        | 0          | 212        | 0  |
|        | 10        | 472          | 29,999,528 | 29,999,528           | 0          | 29,999,528 | 0         | 42        | 0          | 5,627      | 0  |
|        | 12        | 520          | 29,999,480 | 29,999,480           | 0          | 29,999,480 | 0         | 45        | 0          | 64,225     | 0  |
|        | 15        | 575          | 29,999,425 | 29,999,425           | 0          | 29,999,425 | 0         | 82        | 0          | 775,314    | 0  |
|        | 17        | 623          | 29,999,377 | 29,999,377           | 0          | 29,999,377 | 0         | 175       | 0          | 2,052,498  | 0  |
|        | 20        | 718          | 29,999,282 | 29,999,282           | 0          | 29,999,282 | 0         | 417       | 0          | 5,679,869  | 0  |
|        | 22        | 842          | 29,999,158 | 29,999,158           | 0          | 29,999,158 | 0         | 593       | 0          | 10,277,297 | 0  |
| 25     | 1,133     | 29,998,867   | 29,998,867 | 0                    | 29,998,867 | 0          | 1,174     | 0         | 19,676,652 | 0          |    |

## 11 Evaluating the Number of Falsely-Accepted and Falsely-Rejected Pairs Using Single End and Paired End Reads

We assess the accuracy of Shouji using both single end and paired end reads. We first map 3' reads from ERR240727.fastq (i.e., reads from ERR240727\_2.fastq) to the human reference genome (GRCh37) using mrFAST (Alkan et al., 2009) with an edit distance threshold of 2. We then use the first 30 million read-reference pairs that are produced by mrFAST before performing alignment to examine the filtering accuracy of Shouji. In Table 12, we show the number of falsely-accepted and falsely-rejected pairs of Shouji using these 30 million pairs over different edit distance thresholds. Generating the read-reference pairs in this way allows us to examine the filtering accuracy of Shouji using both aligned (i.e., pairs that have edits no more than the allowed edit distance threshold) and unaligned (i.e., pairs that have edits more than the allowed edit distance threshold) pairs. We use the same method to generate set\_1 from ERR240727\_1.fastq, as we describe in Section 3.1 in the main manuscript. We observe that the accuracy of Shouji using 3' reads from ERR240727.fastq remains almost the same as that of Shouji when we use 5' reads from ERR240727.fastq (which we show in Table 9 when we use set\_1). Next, we map both 5' reads and 3' reads from ERR240727.fastq to the human reference genome using the mrFAST mapper in paired end mode. We then use the first 30 million read-reference pairs that are produced by mrFAST before performing alignment to examine the filtering accuracy of Shouji. In Table 13, we show the number of falsely-accepted and falsely-rejected pairs of Shouji using these 30 million pairs. We observe the results are similar when using paired end reads as when using single end reads. Based on Table 12 and Table 13, we conclude that the evaluation of our pre-alignment filter does not depend on the paired end sequencing or paired end reads. Similarly with any dynamic programming sequence alignment algorithm, Shouji always examines a single reference segment with a single read individually and independently from the way this pair is generated. The read mapper is responsible for generating the read-reference pairs that must be verified using a dynamic programming sequence alignment algorithm. Shouji examines these pairs (before using the computationally-expensive sequence alignment algorithms) regardless of the algorithm (e.g., single end read mapping or paired end read mapping) used to generate these pairs.

**Table 12: Number of falsely-accepted and falsely-rejected sequence pairs of Shouji using single end reads from ERR240727\_2.fastq mapped to the human reference genome. We use Edlib (Šošić and Šikić, 2017) to generate the ground truth edit distance value for each sequence pair.**

| $E$ | Edlib baseline |            | Shouji     |            |                  |                  |
|-----|----------------|------------|------------|------------|------------------|------------------|
|     | Aligned        | Unaligned  | Aligned    | Unaligned  | Falsely-Accepted | Falsely-Rejected |
| 0   | 206,252        | 29,793,748 | 206,252    | 29,793,748 | 0                | 0                |
| 1   | 1,359,165      | 28,640,835 | 1,680,722  | 28,319,278 | 321,557          | 0                |
| 2   | 3,308,445      | 26,691,555 | 4,562,146  | 25,437,854 | 1,253,701        | 0                |
| 3   | 5,673,028      | 24,326,972 | 8,290,885  | 21,709,115 | 2,617,857        | 0                |
| 4   | 7,929,996      | 22,070,004 | 12,171,061 | 17,828,939 | 4,241,065        | 0                |
| 5   | 9,920,919      | 20,079,081 | 16,051,171 | 13,948,829 | 6,130,252        | 0                |
| 6   | 11,710,868     | 18,289,132 | 20,532,091 | 9,467,909  | 8,821,223        | 0                |
| 7   | 13,409,936     | 16,590,064 | 23,845,857 | 6,154,143  | 10,435,921       | 0                |
| 8   | 15,078,030     | 14,921,970 | 26,405,117 | 3,594,883  | 11,327,087       | 0                |
| 9   | 16,727,424     | 13,272,576 | 27,901,872 | 2,098,128  | 11,174,448       | 0                |
| 10  | 18,339,408     | 11,660,592 | 28,680,484 | 1,319,516  | 10,341,076       | 0                |

**Table 13: Number of falsely-accepted and falsely-rejected sequence pairs of Shouji using paired end reads from ERR240727.fastq mapped to the human reference genome. We use Edlib (Šošić and Šikić, 2017) to generate the ground truth edit distance value for each sequence pair.**

| $E$ | Edlib baseline |            | Shouji     |            |                  |                  |
|-----|----------------|------------|------------|------------|------------------|------------------|
|     | Aligned        | Unaligned  | Aligned    | Unaligned  | Falsely-Accepted | Falsely-Rejected |
| 0   | 0              | 30,000,000 | 0          | 30,000,000 | 0                | 0                |
| 1   | 373,921        | 29,626,079 | 453,808    | 29,546,192 | 79,887           | 0                |
| 2   | 1,318,319      | 28,681,681 | 1,947,127  | 28,052,873 | 628,808          | 0                |
| 3   | 3,207,952      | 26,792,048 | 5,224,261  | 24,775,739 | 2,016,309        | 0                |
| 4   | 5,500,950      | 24,499,050 | 9,227,434  | 20,772,566 | 3,726,484        | 0                |
| 5   | 7,709,237      | 22,290,763 | 13,305,866 | 16,694,134 | 5,596,629        | 0                |
| 6   | 9,698,512      | 20,301,488 | 18,208,145 | 11,791,855 | 8,509,633        | 0                |
| 7   | 11,529,693     | 18,470,307 | 22,281,600 | 7,718,400  | 10,751,907       | 0                |
| 8   | 13,293,029     | 16,706,971 | 25,736,052 | 4,263,948  | 12,443,023       | 0                |
| 9   | 15,041,936     | 14,958,064 | 27,833,759 | 2,166,241  | 12,791,823       | 0                |
| 10  | 16,782,466     | 13,217,534 | 28,890,050 | 1,109,950  | 12,107,584       | 0                |

## 12 FPGA Acceleration of Shouji and MAGNET

We analyze the benefits of accelerating the CPU implementation of our pre-alignment filters Shouji and MAGNET using FPGA hardware. As we show in Table 14, our hardware accelerators are two to three orders of magnitude faster than the equivalent CPU implementations of Shouji and MAGNET.

**Table 14: Execution time (in seconds) of the CPU implementations of Shouji and MAGNET filters and that of their hardware-accelerated versions (using a single filtering unit).**

| $E$                          | Shouji-CPU | Shouji-FPGA | Speedup   | MAGNET-CPU | MAGNET-FPGA | Speedup   |
|------------------------------|------------|-------------|-----------|------------|-------------|-----------|
| <i>Sequence Length = 100</i> |            |             |           |            |             |           |
| 2                            | 474.27     | 2.89        | 164.11x   | 632.02     | 2.89        | 218.69x   |
| 5                            | 1,305.15   | 2.89        | 451.61x   | 1,641.57   | 2.89        | 568.02x   |
| <i>Sequence Length = 250</i> |            |             |           |            |             |           |
| 2                            | 1,689.09   | 2.89*       | 584.46x   | 5,567.62   | 2.89*       | 1,926.51x |
| 5                            | 6,096.61   | 2.89*       | 2,109.55x | 14,328.28  | 2.89*       | 4,957.88x |

\* Estimated based on the resource utilization and data throughput

## 13 Execution time breakdown of Read Mapping combined with Shouji

We provide the total runtime breakdown of mrFAST (v. 2.6.1) (Alkan et al., 2009) and BWA-MEM (Li, 2013) with Shouji as a pre-alignment filter. We break down the execution time of read mapping with Shouji into 1) read-reference pair generation time, 2) Shouji filtering time, 3) Shouji pre-processing time, 4) Shouji transfer time, and 5) dynamic programming alignment time. The sum of these five runtime values provides the total execution time of read mapping with Shouji as a pre-alignment filter (8<sup>th</sup> column of Table 15 entitled total execution time). We provide the total execution time breakdown of mrFAST (v. 2.6.1 that includes FastHASH (Xin et al., 2013)) (Alkan et al., 2009) and BWA-MEM (Li, 2013) with Shouji compared to the baseline (i.e., the last column of Table 15 represents the runtime of mrFAST and BWA-MEM without Shouji) in Table 15. We map all reads from ERR240727\_1 (100 bp) to GRCh37 with an edit distance threshold of 2% and 5%. Based on Table 15, we make the following key observation: the dynamic programming alignment time drops by a factor of 4-24 (the 7<sup>th</sup> column of Table 15 compared with the 10<sup>th</sup> column of Table 15) after integrating Shouji with read mapping as a pre-alignment step.

We conclude that the ability of Shouji to accelerate read mapping scales very well over a wide range of edit distance threshold values.

**Table 15: Total execution time breakdown (in seconds) of mrFAST and BWA-MEM with and without Shouji, for an edit distance threshold of 2% and 5%. The green shaded columns represent the processing time spent by each step of the original read mapper (without Shouji). The orange and blue shaded columns represent the processing time spent by each step of the accelerated read mapper (with the addition of Shouji as a pre-alignment step). The orange shaded columns represent the processing time spent by Shouji on the FPGA board and the host CPU.**

|         | $E$ | Read mapping time with Shouji |                              |                |               |                | Read mapping time without Shouji (baseline) |                               |                |                      |
|---------|-----|-------------------------------|------------------------------|----------------|---------------|----------------|---------------------------------------------|-------------------------------|----------------|----------------------|
|         |     | Read-ref pair generation time | Shouji (FPGA) filtering time | Shouji (CPU)   |               | Alignment time | Total execution time                        | Read-ref pair generation time | Alignment time | Total execution time |
|         |     |                               |                              | pre-processing | Transfer time |                |                                             |                               |                |                      |
| mrFAST  | 2   | 175.02                        | 0.0616                       | 3.2239         | 0.2919        | 16.6929        | 195.2902                                    | 175.02                        | 67.08          | 242.1                |
|         | 5   | 198.02                        | 1.3176                       | 53.9911        | 6.2457        | 242.8571       | 502.4315                                    | 198.02                        | 2333.99        | 2532.01              |
| BWA-MEM | 2   | 622.1                         | 0.0010                       | 0.0516         | 0.0050        | 4.8219         | 626.9794                                    | 622.1                         | 46.02          | 668.12               |
|         | 2*  | 623.03                        | 0.0124                       | 0.6477         | 0.0622        | 2.0729         | 625.8252                                    | 623.03                        | 47.08          | 670.11               |
|         | 5   | 649.02                        | 0.0010                       | 0.0521         | 0.0050        | 4.7089         | 653.7870                                    | 649.02                        | 46.12          | 695.14               |
|         | 5*  | 650.01                        | 0.0129                       | 0.6740         | 0.0647        | 1.9190         | 652.6806                                    | 650.01                        | 46.08          | 696.09               |

## 14 Edlib, Parasail, SHD, mrFAST, and BWA-MEM Configurations

In Table 16, we list the software packages that we cover in our performance evaluation, including their version numbers and function calls used.

**Table 16: Read aligners and pre-alignment filters used in our performance evaluations.**

---

|                                                                                                                                                                                                                                                                                                                                                                                                                                                                                                                                                                                                                                                                                                                                                                                                                                                                                                    |
|----------------------------------------------------------------------------------------------------------------------------------------------------------------------------------------------------------------------------------------------------------------------------------------------------------------------------------------------------------------------------------------------------------------------------------------------------------------------------------------------------------------------------------------------------------------------------------------------------------------------------------------------------------------------------------------------------------------------------------------------------------------------------------------------------------------------------------------------------------------------------------------------------|
| <p><b>Edlib: November 5 2017</b></p> <p>Banded Levenshtein Distance:<br/>EdlibAlignResult resultEdlib = edlibAlign(RefSeq, ReadLength, ReadSeq, ReadLength, edlibNewAlignConfig(ErrorThreshold, EDLIB_MODE_NW, EDLIB_TASK_PATH, NULL, 0));<br/>edlibFreeAlignResult(resultEdlib);<br/>if (resultEdlib.editDistance!= -1)<br/>    Accepted =1;<br/>else Accepted =0;</p> <p>Banded Levenshtein Distance with backtracking:<br/>EdlibAlignResult resultEdlib = edlibAlign(RefSeq, ReadLength, ReadSeq, ReadLength, edlibNewAlignConfig(ErrorThreshold, EDLIB_MODE_NW, EDLIB_TASK_PATH, NULL, 0));<br/>char* cigar = edlibAlignmentToCigar(resultEdlib.alignment, resultEdlib.alignmentLength, EDLIB_CIGAR_STANDARD);<br/>free(cigar);<br/>edlibFreeAlignResult(resultEdlib);</p>                                                                                                                     |
| <p><b>Parasail: January 7 2018</b></p> <pre>function = parasail_lookup_function("nw_banded");<br/>result = function(RefSeq, ReadLength, ReadSeq, ReadLength, 10, 1, ErrorThreshold, &amp;parasail_blosum62);<br/>if(parasail_result_is_trace(result)==1){<br/>    parasail_traceback_generic(RefSeq, ReadLength, ReadSeq, ReadLength, "Query:", "Target:", &amp;parasail_blosum62, result, ' ', ':', '!', 50, 14, 0);<br/>    if (result-&gt;score != 0) {<br/>        cigar2=parasail_result_get_cigar(result, RefSeq, ReadLength, ReadSeq, ReadLength, &amp;parasail_blosum62);<br/>        parasail_cigar_free(cigar2);<br/>    }<br/>}</pre>                                                                                                                                                                                                                                                   |
| <p><b>SHD: November 7 2017, compiled using g++-4.9</b></p> <pre>for (k=1;k&lt;=1+(ReadLength/128);k++)<br/>    totalEdits= totalEdits + (bit_vec_filter_sse1(read_t, ref_t, length, ErrorThreshold));</pre>                                                                                                                                                                                                                                                                                                                                                                                                                                                                                                                                                                                                                                                                                        |
| <p><b>mrFAST: November 29 2017</b></p> <pre>./mrfast-2.6.1.0/mrfast --search human_g1k_v37.fasta --seq ../ERR240727_1_100bp.fastq -e 2</pre> <p>The human reference genome can be downloaded from:<br/><a href="ftp://ftp.ncbi.nlm.nih.gov/1000genomes/ftp/technical/reference/human_g1k_v37.fasta.gz">ftp://ftp.ncbi.nlm.nih.gov/1000genomes/ftp/technical/reference/human_g1k_v37.fasta.gz</a></p> <p>Extracting read-reference pairs:</p> <ol style="list-style-type: none"><li>1- Add the following to line 1786 of <a href="https://github.com/BilkentCompGen/mrfast/blob/master/MrFAST.c">https://github.com/BilkentCompGen/mrfast/blob/master/MrFAST.c</a></li><li>2- Extract reference segment:<br/>for (n = 0; n &lt; 100; n++) printf("%d", _msf_refGen[n + genLoc + _msf_refGenOffset - 1 - leftSeqLength]);</li><li>3- Extract read sequence:<br/>printf("%t%s\n", _tmpSeq);</li></ol> |
| <p><b>BWA-MEM: November 25 2018</b></p> <pre>./bwa mem -w 3 ../human_g1k_v37.fasta ../././Desktop/Filters_29_11_2016/ERR240727_1_100bp.fastq</pre> <p>Report all secondary alignments:<br/>./bwa mem -a -w 3 ../human_g1k_v37.fasta ../././Desktop/Filters_29_11_2016/ERR240727_1_100bp.fastq</p> <p>Extracting read-reference pairs:</p> <ol style="list-style-type: none"><li>1- Add the following code between line 166 and line 167 of <a href="https://github.com/lh3/bwa/blob/master/bwa.c">https://github.com/lh3/bwa/blob/master/bwa.c</a></li><li>2- Extract reference segment:<br/>for (i = 0; i &lt; rlen; ++i) putchar("ACGTN"[(int)rseq[i]]); putchar('\t');</li><li>3- Extract read sequence:<br/>for (i = 0; i &lt; 1_query; ++i) putchar("ACGTN"[(int)query[i]]); putchar('\n');</li></ol>                                                                                         |

---

## REFERENCES

- Alkan, C., Kidd, J. M., Marques-Bonet, T., Aksay, G., Antonacci, F., Hormozdiari, F., Kitzman, J. O., Baker, C., Malig, M. and Mutlu, O. (2009) Personalized copy number and segmental duplication maps using next-generation sequencing, *Nature genetics*, **41**, 1061-1067.
- Alser, M., Hassan, H., Xin, H., Ergin, O., Mutlu, O. and Alkan, C. (2017) GateKeeper: a new hardware architecture for accelerating pre-alignment in DNA short read mapping, *Bioinformatics*, **33**, 3355-3363.
- Alser, M., Mutlu, O. and Alkan, C. (July 2017) Magnet: Understanding and improving the accuracy of genome pre-alignment filtering, *Transactions on Internet Research* **13**.
- Li, H. (2013) Aligning sequence reads, clone sequences and assembly contigs with BWA-MEM, *arXiv preprint arXiv:1303.3997*.
- McNamara, M. (2001) IEEE Standard Verilog Hardware Description Language. The Institute of Electrical and Electronics Engineers, Inc. *IEEE Std*, 1364-2001.
- Šošić, M. and Šikić, M. (2017) Edlib: a C/C++ library for fast, exact sequence alignment using edit distance, *Bioinformatics*, **33**, 1394-1395.
- Xilinx (November 17, 2014) 7 Series FPGAs Configurable Logic Block User Guide. Xilinx.
- Xin, H., Greth, J., Emmons, J., Pekhimenko, G., Kingsford, C., Alkan, C. and Mutlu, O. (2015) Shifted Hamming Distance: A Fast and Accurate SIMD-Friendly Filter to Accelerate Alignment Verification in Read Mapping, *Bioinformatics*, **31**, 1553-1560.
- Xin, H., Lee, D., Hormozdiari, F., Yedkar, S., Mutlu, O. and Alkan, C. (2013) Accelerating read mapping with FastHASH, *BMC genomics*, **14**, S13.
